1 **Effect of Electromagnetic Field (EMF) and Electric Field (EF) on Some Behavior of**  
2 **Honeybees (*Apis mellifera* L.)**

3 **Effect Of Electromagnetic Field On Honeybees**

4 **Yaşar ERDOĞAN<sup>1\*</sup> and Mahir Murat CENGİZ<sup>2</sup>**

5 \*1- Bayburt University, Demirözü Vocational High School, Veterinary Department, Bayburt,  
6 Turkey. yasarerdogan@hotmail.com.

7 2-Atatürk University, Erzurum Vocational High School Department of Horse Training.  
8 Erzurum, Turkey

9 **KEY WORDS: Apiculture, Detect food, Magnetoreception, Helmholtz coil equipment**

10

11

12

13

14

15

16

17

18

19

20

21

22

23

24

25

26

27

28           **Summary**

29           Honeybees uses the magnetic field of the earth to to determine their direction.  
30           Nowadays, the rapid spread of electrical devices and mobile towers leads to an increase in  
31           man-made EMF. This causes honeybees to lose their orientation and thus lose their hives.

32           **ABSTRACT**

33           Geomagnetic field can be used by different magnetoreception mechanisms, for  
34           navigation and orientation by honeybees. The present study analyzed the effects of magnetic  
35           field on honeybees. This study was carried out in 2017 at the Bayburt University Beekeeping  
36           Application Station. In this study, the effect of Electro Magnetic field (EMF) and electric field  
37           (EF) on the time of finding the source of food of honeybees and the time of staying there were  
38           determined. The honeybees behaviors were analyzed in the presence of external magnetic  
39           fields generated by Helmholtz coils equipment. The Electro Magnetic field values of the coils  
40           were fixed to 0  $\mu$ T (90mV/m), 50  $\mu$ T (118 mV/m), 100  $\mu$ T (151 mV/m), 150  $\mu$ T (211 mV/m),  
41           200  $\mu$ T (264 mV/m). Petri dishes filled with sugar syrup were placed in the center of the coils.  
42           According to the study, honeybees visited at most U1 (mean =21.0 $\pm$ 17.89 bees) and at least  
43           U5 (mean =10.82 $\pm$ 11.77 bees). Honeybees waited for the longest time in U1 (mean =35.27 $\pm$   
44           6.97 seconds) and at least in U5 (mean =12.28 $\pm$ 5.58 seconds). According to the results  
45           obtained from this first study showed that honeybees are highly affected by electromagnetic  
46           radiation and electric field.

47           **INTRODUCTION**

48           Living things have been adapted to the magnetic field of the Earth they were exposed to  
49           as a result of millions of years of natural selection. Many organisms use the magnetic field of  
50           the earth in space and time orientation (Wiltschko and Wiltschko, 2005). There is a scientific  
51           discipline called Magnetobiology, which investigates the effects of magnetic fields on living  
52           things.

53           Magnetobiology was formed by the unification of many scientific principles around  
54           biophysics. Magnetic fields are important ecological factors that can affect living things  
55           (Binhi and Savin, 2003; Rosen, 2003). Many studies have examined the possible effects of  
56           EMF and EF on animals. Magnetic fields and electric fields can have an impact on the daily  
57           activities, behaviors and spatial orientations of living things (Klotz and Jander, 2003; Vacha,  
58           2006; Vacha et al., 2008). Studies have shown that ELF and EMF cause some physiological  
59           and behavioral changes on insects and increase stress protein levels. (Wyszkowska et al.2006;

60 Wyszowska et al. 2016). In another study carried out by Rooder (1999), they found that  
61 there was a significant increase in the motor activity of insects as EMF increased octopamine  
62 levels in insects. Honeybees are one of the most important insect affected by the  
63 electromagnetic field.

64 Many studies have been conducted on the response of honeybees to the electromagnetic  
65 field. They can be summarized as follows: When extra magnetic field was applied, comb  
66 building behavior and hive orientation were changed (Collett and Baron, 1994; Frier et  
67 al.1996). Free-flying honey bees can detect weak magnetic field fluctuations as much as 26  
68 nT. It has emerged in T-labyrinth experiments where honey bees are affected by short  
69 magnetic pulses (Kirschvink, and Kobayashi-Kirschvink,1991). The magnetic remanence was  
70 detected in the abdomen of honeybees (Gould et al. 1978). Iron granules (IGs), 0.560.1 mm  
71 diameter were found in trophocytes surrounding the abdomen (Hsu and Li, 1993). Four IGs  
72 trophocyte super paramagnetic magnetite was detected under high resolution transmission  
73 electron microscopy (Hsu and Li, 1999).  $Fe_3O_4$  and  $FeOOH$  were found in the honey bees (El-  
74 Jaick et al. 2001).

75 These results suggest that in addition to behavioral evidence, honeybees have  
76 biomagnetites necessary for magnetoreception. That is to say, honeybees have the capacity of  
77 magnetoreceptics. However, no evidence has been found to explain this capacity so far (Hsu  
78 et al. 2007).

79 Honeybees are of great importance for humanity and nature for many reasons.  
80 Honeybees make a great contribution to nature by providing pollination of plants other than  
81 producing beekeeping products. Therefore, bees are important pollinators for both natural  
82 vegetation and for crops (Castro, 2001). According to the studies conducted, the economic  
83 value of honeybees was about 153 billion euros in 2005 (Gallai et al., 2009). The European  
84 honeybees (*Apis mellifera* L.) is one of the most effective pollinator insects (Garibaldi et al.,  
85 2011, Garibaldi et al., 2014). In addition, *Apis mellifera* L. is the most widely used bees in the  
86 world for beekeeping.

87 Honeybees carry honey, pollen, propolis, and water from the outside to their hives.  
88 Honeybees are talented insects who can find plants in the field and return to the hive. Worker  
89 honeybees are rare social insects that collect foods from distances of up to 8-12 km and return  
90 to their hives without losing direction.

91 Honeybees use the position of the sun (Rossel and Wehner, 1984), polarized light  
92 (Rossel and Wehner, 1986; Evangelista et al., 2014) and landmarks (Dyer and Gould, 1981)  
93 to determine their direction.

94 The ability of the bees to feel the Electromagnetic field of the Earth is one of the most  
95 important factors that honeybees use in finding direction. Although it is thought that the most  
96 important factor that honeybees use in finding direction is the sun; they can also use **cues** such  
97 as smell, polarized light, compass of the sky, signs around the hive, chemicals, acoustic  
98 instruments and magnetic field.

99 The state of the sky (cloudy sky or clear blue sky) and the time of day determine which  
100 of these elements will be used by honeybees. Today, the use of devices that produce the  
101 Electro Magnetic field such as mobile towers, mobile phones, Wi-Fi, Bluetooth, electric  
102 appliances and high voltage lines has increased considerably.

103 The increase in these devices has led to debates that the ability of the honeybee to  
104 navigate has disappeared when the magnetic field causes negativity on human and other living  
105 things. Depending on the intensity of the magnetic field and the duration of exposure, the risk  
106 of developing cancer (Wertheimer and Leeper 1979) leukemia (Greenland et al., 2000; Draper  
107 et al., 2005), lymphoblastic leukaemia (Hatch et al., 1998), acute lymphoblastic leukaemia  
108 (Kabuto et al. 2006) and alzheimer's (Huss et al., 2006) are increased.

109 According to the results of the studies, it was found that humans (Leszczynski et al.,  
110 2002; Gandi and Singh, 2005; Hardell and Sage, 2008), rabbits, rats (Moorhouse and  
111 Macdonald, 2005), bats (Nicholls and Racey, 2007; Nicholis and Paul, 2007), birds (Everaert  
112 and Bauwens, 2007; Balmori, 2009; Grigoriev, 2003), frogs (Balmori, 2006; Balmori, 2010),  
113 nematodes, Drosophila (Ghamdi, 2012), plants (Belyavskaya, 2001; Haggerty, 2010), Paper  
114 wasp (Pereira-Bomfim et al. 2015), and honey bees (Harst et al., 2006; Sharma and Kumar,  
115 2010; Favre, 2011) have been reported to be influenced by electromagnetic fields (EMF).

116 Pereira-Bomfim et al. (2015) showed that the social wasp *Polybia paulista* is sensitive  
117 to modifications in the local geomagnetic field. This study, which was made with magnets  
118 and Helmholtz coils equipment, showed that the change of the magnetic field affects the flight  
119 activity of *Polybia paulista* (Ihering) .

120 Recently there have been reports of many factors affecting the development of  
121 honeybees, such as disease, natural enemies, pesticides and adverse climatic conditions  
122 (Favre, 2011).

123           The increase in losses in bee colonies all over the world has caused a phenomenon in  
124           which the number of bees in the hive decrease very rapidly, without showing the symptom of  
125           an illness. Scientists believe that these phenomena, called the Colony Collapse Disorder  
126           (CCD) (Gallai et al., 2009), are caused by viruses, unscientific farm applications,  
127           monoculture, no hygienic farming conditions, sudden changes in the climate, pesticides, air  
128           pollution, and even GMO crops.

129           At present, it is argued that the most important cause of CCD is electromagnetic  
130           pollution (Kumar, 2018; Taye et al., 2017; Cammaerts, 2017). Due to increased  
131           electromagnetic pollution, it is suggested that the honeybees come out from the hive for  
132           honey, pollen, propolis or water collect but they do not return to the hive.

133           Honeybees have magnetite crystal structures in body fat cells. These magnetite  
134           structures are the active components of the magneto-reception system. Thanks to these  
135           structures, honeybees can feel even slight changes in the magnetic field lines of the earth.  
136           These delicate structures are affected by the slightest magnetic pollution to occur and cause  
137           the honeybees to lose their direction. The bee dances that honeybees use to communicate with  
138           each other are distorted (Favre, 2011).

139           The electromagnetic field consists of electromagnetic waves. Electromagnetic waves  
140           consist of Electric Field and Magnetic Field components. These waves move at the speed of  
141           light.

142           Electromagnetic fields are physical fields produced by an Electro Magnetic field source.  
143           Electromagnetic waves are found in the continuous wavelength/frequency spectrum. The  
144           shorter the wavelength, the higher the frequency (Hernandez et al., 2010).

145           The Electro Magnetic Field is measured as the magnetic flux density and the unit is  
146           Tesla (T). The frequency of the electric magnetic fields is expressed in Hertz (Hz) (Vecchia et  
147           al., 2009).

148           Electro Magnetic field measurements can be influenced by different factors such as  
149           strength and distance of the source, the physical environment of the sites, the frequency of the  
150           radiation and possible modulation, reflection or polarization (Vecchia et al., 2009).

151           According to many studies, it has been reported that radio frequency and  
152           electromagnetic radiation (EMR) produce many misleading biological effects that disrupt the  
153           functions of all biological systems and all organisms (Blank and Goodman, 2009; Rööslü et  
154           al., 2008; Schuz and Ahlbom., 2008)

155 The electromagnetic field can affect the immune system, working behavior and  
156 physiology of honeybees and ultimately cause them to disappear (Pattazhy, 2011). According  
157 to Sharma and Kumar (2010), a large amount of radiation also disturbs the bee's ability to  
158 navigate and prevents them from returning to their hives. Honeybees are like a bioindicator of  
159 electromagnetic radiation because brain anatomies and learning regions are well known for  
160 associative learning abilities (Schwarzal and Muller, 2006). According to Pattazhy (2011), if  
161 the number of towers and mobile phones increases, honeybee may disappear within a decade.

162 According to the study, significant differences were found in returning to the hives of  
163 honeybees: 40 percent of the non- irradiated bees and 7.3 percent of the irradiated ones  
164 returned to their hives (Stefan et al., 2013). In this study, it was aimed to detect the effect of  
165 electromagnetic field intensity on the honeybees and waiting time of the bees in the area of  
166 the experiment.

## 167 MATERIALS AND METHODS

168 The study was conducted on Caucasian honeybees (*Apis mellifera caucasica*).  
169 Caucasian bees are dark bees with gray hairs. They originated from the Caucasus mountains.

170 These bees are fairly gentle and have a longer language than other honeybee subspecies.  
171 They winter well in cold climates and raise strong colonies in the spring. Honey and Propolis  
172 production is more than other bee species and they are quite plundering but they are sensitive  
173 to *Nosema apis* and *Nosema ceranae*.

174 This study was carried out in 2017 at the Bayburt University Beekeeping Application  
175 and Research Station (40° 10' 09" N, 39° 50' 53 26" E). This Study was conducted in  
176 order to determine the effects of the electromagnetic field on honeybees' time to locate food  
177 and their waiting time in the area.

178 In order to identify the numbers of bees that came to the Petri dishes for feeding, the  
179 experimental setup was placed at a distance of 100 m from the 50 caucasian hybrid bee  
180 colonies in the bee yard. Helmholtz coil equipment were placed in the rear of the bee yard,  
181 with a distance of 1.5m between them. In order to prevent chaos between the beehives and to  
182 make it easier to work, the back part of bee yard was preferred (Fig. 1).

183 Helmholtz coil equipment was used to create electric and magnetic fields. Five  
184 Helmholtz bobbins and five different magnetic field levels were used in the study (Table: 1).  
185 The magnetic field strength produced by the Helmholtz coil equipment is adjusted by

186 changing the voltage of the electricity applied to the coils. In this study, 50 Hz AC electricity  
187 was used.

188 The Electromagnetic Field generated by the Helmholtz coil equipment was measured in  
189 terms of  $\mu\text{T}$  with the help of a TES Magnetic Field Meter model 1393. A diagram of the  
190 experimental setup is shown in Fig. 2. When the electromagnetic field is generated, the  
191 electric field also occurs at the same time. Both have an impact on living things. The strength  
192 of Electro Magnetic Radiation generated by Helmholtz coils equipment is measured in terms  
193 of  $\text{mV} / \text{m}$  with the help of TES Electrosmog meter brand, model 593.

194 Petri dishes containing 25 cc 1: 1 syrup was placed in the center of Helmholtz bobbins  
195 and the experimental setup was prepared. The study began in the second week of June. Count  
196 down of honey bees were made between 14-16 o'clock. Because in the region where the study  
197 was conducted, the most intense nectar in this time range is carried. All of the helmotz coils  
198 equipment were energized at 14 o'clock at the same time and power was cut off at 16 o'clock.

199 The honeybees from the Petri dish were observed one by one, the period of time spent  
200 on the Petri dish was determined and recorded as the waiting period. This process was  
201 repeated 3 times with at least at 15 day intervals. I took care to make the honeybees count  
202 down on rainless and windless days. The juxtaposition of the Helmholtz coils equipment was  
203 done every time by draw lots.

204 The number of honeybees that came to feed in Petri dishes was detected, by counting  
205 with a minute interval. The counting process was continued until the syrup in the Petri dish  
206 was finished. All statistical analyses were performed using SPSS statistical software (IBM  
207 SPSS Statistics 22).

## 208 **RESULTS**

209 As a first observation at the beginning of the study, honeybees began to circulate around  
210 petri dishes, but they did not alight on in Petri dishes. The first honeybee alight on Petri dish  
211 U1 (control (0  $\mu\text{T}$ , 90  $\text{mV}/\text{m}$ ) after 5 minutes, followed by U2 (50  $\mu\text{T}$ , 118  $\text{mV}/\text{m}$ ), U3 (100  
212  $\mu\text{T}$ , 151  $\text{mV}/\text{m}$ ), U4 (150  $\mu\text{T}$ , 211  $\text{mV}/\text{m}$ ), and U5 (200  $\mu\text{T}$ , 264  $\text{mV}/\text{m}$ ). The most visited,  
213 application was U1 (0  $\mu\text{T}$ , 90 $\text{mV}/\text{m}$ ) (mean  $21.07 \pm 17.89$  bees) and the least visited  
214 application was U5 (200  $\mu\text{T}$ , 264  $\text{mV}/\text{m}$ ) (mean  $10.82 \pm 11$ , 77 bees) (Table 2). Honeybees  
215 have passed intensely on Petri dishes with a magnetic field at the top after finishing the feed  
216 in the Petri dish. As the magnetic field intensity increases, the demand for honeybees  
217 decreases and reluctance is seen (Table 1). Although the bees placed in the U1 (0  $\mu\text{T}$ , 90

218 mV/m) Petri dish where no magnetic field was present stayed here for longer (mean 37.88 s)  
219 (Table 1), the bees placed in U5 (200  $\mu$ T, 264 mV/m) Petri dishes with high magnetic field  
220 abandoned Petri dishes in much shorter time (mean 12.61 Sec).

221 From the multiple comparison tests conducted, it was found that the application groups  
222 were located in different groups (Table 2).

223 Analyzes of variance were made for bee numbers in Petri dishes (Table 3) and for the  
224 time they spent in Petri dishes of honey bees (Table 4).

225 According to these results, while the highest number of bees and the waiting time were  
226 0  $\mu$ T magnetic fields applied Petri dishes, the number of bees that alight on and the duration  
227 of stay was the lowest of 200  $\mu$ T magnetic fields applied Petri dish (Table 2).

## 228 **DISCUSSION**

229 Different studies from different regions of the world have reported the negative effect of  
230 EMF emitted from cell phone towers, high voltage wires and various electronic devices on  
231 honey bees with regard to strength, navigation, behavior, honey store, pollen store and brood  
232 area, etc. (Harst et al., 2006; Stefan et al., 2013; Sharma and Kumar, 2010; Pereira-Bomfim et  
233 al. 2015).

234 However, some other researchers have reported that EMF has no effect on honeybees  
235 (Mixson et al., 2009; Blacquiere and Hoofwijk, 2010).

236 According to a study conducted by Mall and Kumar, the bee colonies were not affected  
237 by EMF but reported that they could damage honeybees in the long term (Mall and Kumar,  
238 2014).

239 Studies on the effects of electromagnetic fields on honey bees have shown that initiation  
240 of foraging, cessation of foraging and number of incoming foragers are negatively affected  
241 (Harst et al., 2006; Kimmel et al., 2007; Stefan et al., 2013; Sharma and Kumar, 2010;  
242 Pattazhy, 2011; Darney et al., 2016; Taye et al. 2017) the number of outgoing foragers  
243 (Valberg, 2010; Sharma and Kumar, 2010), the successful return of marked feeders (Harst et  
244 al., 2006; Stefan et al., 2013)

245 On the contrary, a few researchers have argued that the EMF does not have a negative  
246 effect on honeybees (Mixson et al., 2009; Blacquiere and Hoofwijk, 2010; Singh, 2014).



247           Considering these studies, a study entitled "The Effect of Electromagnetic Field (EMF)  
248 on Nutritional Behavior of Honey Bees (*Apis mellifera* L.)" was conducted at Bayburt during  
249 2017.

250           The study on the number of incoming bees increased from U1 (control 0  $\mu$ T, 90 mV/m,  
251 10.82 $\pm$ 11.77 bees) to U5 (200  $\mu$ T, 264 mV/m, 21.07 $\pm$ 17.89 bees). It was observed that when  
252 the EMF or electric field intensity increases the number of bees that arrived in the Petri dishes  
253 and the waiting time of them decreases (Table 2).

254           That is, the EMF or electric field intensity increases, the number of bees from petri  
255 dishes and the waiting time of Petri dishes decreases.

## 256           **Conclusion**

257           The present results showed that honeybees are sensitive to the modification of EMF or  
258 electric field intensity.

259           Recently, Valkova and Vacha (2012) discussed the possibility of using honeybees for  
260 both magnetic nanoparticles and the magnetic field of the earth to detect the geomagnetic  
261 field.

262           In conclusion, Honeybees have been observed for the first time under the influence of  
263 electric and electromagnetic fields. Firstly, honeybees have been added to the list of animals  
264 that have been studied on magnetoreception and electroreception.

265           It can be deduced from our results that areas where the electromagnetic field is dense  
266 will be less visited by bees, resulting in the fact that plants and fruit trees in these regions will  
267 not be sufficiently pollinated. This will cause a decrease in the quality of fruits and other plant  
268 products.

269           The development of technology increased by electromagnetic pollution will effect  
270 honeybees and crop production negatively. The apiaries should be installed away from high-  
271 voltage lines, base stations, industrial zones and residential areas in order to reduce the  
272 negative impact of the electromagnetic field or the electric field on honeybees.

## 273           **Acknowledgments**

274

## 275           **Competing interests**

276           There is no conflict of interest.

277           **Funding**

278           The authors thank the Bayburt University for their financial support

279

280

281

282           **REFERENCES**

283           **Balmori, A. (2006).** The incidence of electromagnetic pollution on the amphibian  
284 decline: Is this an important piece of the puzzle? *Toxicological and Environmental Chemistry*  
285 **88(2)**, 287–299.

286           **Balmori, A. (2009).** Electromagnetic pollution from phone masts. Effects on wildlife.  
287 *Pathophysiology* **16**, 191–199.

288           **Balmori, A. (2010).** Mobile Phone mast effects on common frog (*Rana temporaria*)  
289 tadpoles: the city turned into a laboratory. *Electromagnetic Biology and Medicine* **29**, 31–35.

290           **Belyavskaya, N. A. (2001).** Ultrastructure and calcium balance in meristem cells of pea  
291 roots exposed to extremely low magnetic fields. *Adv. Space Res* **28(4)**, 645-450

292           **Binhi, V.N. and Savin, A.V. (2003)** Effects of weak magnetic fields on biological  
293 systems: physical aspects. *Physics-Uspekhi* **46**, 259– 291.

294           **Blacquiere, T. and Hoofwijk, H. (2010).** Sham or reasons for concern ? the influences  
295 of electromagnetic fields on honey bees. Science shop Wageningen UR, Nov- Dec.

296           **Blank, M. and Goodman, R. (2009).** Electromagnetic fields stress living cells.  
297 *Pathophysiology: the official journal of the International Society for Pathophysiology/ISP* **16**,  
298 71–78.

299           **Cammaerts, M.C. (2017).** Is electromagnetism one of the causes of the CCD? A work  
300 plan for testing the hypothesis. *J Behav* **2(1)**: 1006.

301           **Castro, D. (2001).** Propolis: biological and pharmacological activities. therapeutic uses  
302 of this bee-product. *Annual Review Biomedical Science* **3**, 49-83.

303           **Collett, T.S. and Baron, J. (1994).** Biological compasses and the coordinate frame of  
304 landmark memories in honeybees. *Nature* **368**, 137–140.

- 305           **Darney, K., Giraudin, A., Joseph, R., Abadfie, P., Aupinel, P., Decourtye, A.,**  
306 **Bourg, E.L. and Gauthier, M. (2016).** Effect of high-frequency radiations on survival of the  
307 honeybee (*Apis mellifera* L.). *Apidologie* **47**, 703–710.
- 308           **Draper, G., Vincent, T., Kroll, M.E., Swanson, J. (2005).** Childhood cancer in  
309 relation to distance from high voltage power lines in England and Wales: a case-control study.  
310 *Br Med J*; **330**, 1290–4.
- 311           **Dyer, F.C and Gould, J.L. (1981).** Honey bee orientation: a backup system for cloudy  
312 days. *Science* **214**, 1041–1042.
- 313           **El-Jaick, L.J., Acosta-Avalos, D., Motta de Souza Esquivel, D., Wajnberg, E., and**  
314 **Paixaõ Linhares, M. (2001).** Electron paramagnetic resonance study of honeybee *Apis*  
315 *mellifera* abdomens. *Eur Biophys J* **29**, 579–586.
- 316           **Everaert, J., and Bauwens, D. (2007).** A possible effect of electromagnetic radiation  
317 from mobile phone base stations on the number of breeding house sparrows (*Passer*  
318 *domesticus*). *Electromagnetic Biology and Medicine* **26**, 63–72.
- 319           **Evangelista, C., Kraft, P., Dacke, M., Labhart, T. and Srinivasan, M.V. (2014).**  
320 Honeybee navigation: critically examining the role of the polarization compass. *Philos Trans*  
321 *R Soc Lond B Biol Sci.* 369(1636).
- 322           **Favre, D. (2011).** Mobile phone-induced honeybee worker piping. *Apidologie.* **42(3)**,  
323 270-279.
- 324           **Frier H., Edwards E., Smith, C., Neale, S. and Collett, T. (1996).** Magnetic compass  
325 cues and visual pattern learning in honeybees. *J Exp Biol* **199**, 1353–1361.
- 326           **Gallai, N., Salles, J.M., Settele, J. and Vaissiere, B.E. (2009).** Economic valuation of  
327 the vulnerability of world agriculture confronted with pollinator decline. *Ecological*  
328 *Economics.* **68**, 810-821.
- 329           **Gandhi, A. G., Singh, P. (2005).** Cytogenetic damage in mobile phone users:  
330 preliminary data. *Int. J. Hum. Genet.* **5**, 259-265.
- 331           **Garibaldi, L.A., Aizen, M.A., Klein, A.M., Cunningham, S.A. and Harder, L.D.**  
332 **(2011).** Global growth and stability of agricultural yield decrease with pollinator  
333 dependence. *Proc. Natl. Acad. Sci. USA* **108**, 5909–5914.
- 334           **Garibaldi, L.A., Carvalho, L.G., Leonhardt, S.D., Aizen, M.A., Blaauw, B.R.,**

- 335 **Isaacs, R., Kuhlmann, M., Kleijn, D., Klein, A.M., Kremen, C., Morandin, L. and**  
336 **Scheper, J., Winfree, R. (2014).** From research to action: enhancing crop yield through  
337 wild pollinators. *Front. Ecol. Environ.* **12**, 439–447.
- 338 **Ghamdi, M. S. A. (2012).** The Effect of Static Electric Fields on Drosophila Behaviour.  
339 Master of Philosophy Thesis University of Southampton.
- 340 **Greenland, S., Sheppard, A.R., Kaune, W.T., Poole, C., Kelsh, M.A. (2000).** The  
341 Childhood Leukemia-EMF Study Group. A pooled analysis of magnetic fields, wire codes,  
342 and childhood leukemia. *Epidemiology* **11**, 624–34
- 343 **Grigoriev, I. G. (2003).** Influence of the electromagnetic field of the mobile phones on  
344 chickens embryo, to the evaluation of the dangerousness after the criterion of this mortality. *J.*  
345 *Radiation Biol.* **5**, 541–544
- 346 **Gould, J.L., Kirschvink, J.L. and Deffeyes, K.S. (1978).** Bees have magnetic  
347 remanence. *Science* **201**, 1026–1028.
- 348 **Haggerty, K. (2010).** Adverse Influence of radio frequency background on trembling  
349 aspen seedlings: Preliminary observations. *International Journal of Forestry Research* 7p.
- 350 **Hardell, L and Sage, C. (2008).** Biological effects from electromagnetic field exposure  
351 and public exposure standards. *Biomedicine and Pharmacotherapy* **62**, 1-6.
- 352 **Harst, W., Kuhn, J. and Stever, H. (2006).** Can electromagnetic exposure cause a  
353 change in behaviour? Studying possible non-thermal influences on honey bees: an approach  
354 within the framework of educational informatics. *Acta Syst. Int. J.* **6(1)**, 1-6
- 355 **Hatch, E.E., Linet, M.S., Kleinerman, R.A., Tarone, R.E., Severson, R.K. (1998).**  
356 Association between childhood acute lymphoblastic leukemia and use of electrical appliances  
357 during pregnancy and childhood. *Epidemiology.* **9**, 234–45.
- 358 **Hernandez, C. U., Carolina, U., Coretta, J., Hanneke, R., Marloes van, L., Erik, K.**  
359 **and Sebastien, B. (2010).** Sham or Reasons For Concern? The Influences Of Electromagnetic  
360 Fields on Honey bees. Student report commissioned by the Scienceshop of Wageningen U R
- 361 **Hsu, C.Y. and Li, C.W. (1993).** The ultrastructure and formation of iron granules in  
362 the honeybee (*Apis mellifera*). *J Exp Biol* **180**, 1–13.
- 363 **Hsu, C.Y. and Li, C.W. (1994).** Magnetoreception in honeybees (*Apis mellifera*).  
364 *Science* **265**, 95–97.

- 365           **Hsu, C.Y., Ko, F.Y., Li, C.W., Fann, K. and Lue, J.T. (2007).** Magnetoreception  
366 System in Honeybees (*Apis mellifera*). PLoS ONE **2(4)**: e395.
- 367           **Huss, A., Spoerri, A., Egger, M. and Roosli, M. (2006).** For the Swiss National  
368 Cohort Study. Residence near power lines and mortality from neurodegenerative diseases:  
369 longitudinal study of the Swiss population. *Am J Epidemiol*;**169**, 167–75.
- 370           **Kabuto, M., Nitta, H., Yamamoto, S., Yamaguch, N. and Akiba, S. (2006).**  
371 Childhood leukemia and magnetic fields in Japan: a case-control study of childhood leukemia  
372 and residential power-frequency magnetic fields in Japan. *Int J Cancer*;**119**, 643–50.
- 373           **Kimmel, S., Kuhn, J., Harst, W. and Stever, H. (2007).** Effect of electromagnetic  
374 exposition on the behaviour of the honey bees (*Apis mellifera*). *Acta Systemica-IAAS*  
375 *International Journal*.1-6pp.
- 376           **Kirschvink, J.L. and Kobayashi-Kirschvink, A. (1991).** Is geomagnetic sensitivity  
377 real? replication of the Walker-Bitterman magnetic conditioning experiment in honey bees.  
378 *Amer Zool* **31**, 169–185.
- 379           **Klotz, J and Jander, R. (2003).** Magnetic sense. *Encyclopedia of Insects* (ed. by VH  
380 Resh and RT Carde), pp. 670–672. Academic Press, London, UK.
- 381           **Kumar, S.S. (2018).** Colony Collapse Disorder (CCD) in Honey Bees Caused by EMF  
382 Radiation. *Bioinformation* **14(9)**, 521-524
- 383           **Leszczynski, D., Joenväärä, S., Reivinen, J. and Kuokka, R. (2002).** Non-thermal  
384 activation of the hsp27/p38MAPK stress pathway by mobile phone radiation in human  
385 endothelial cells: Molecular mechanism for cancer and blood-brain barrier-related effects.  
386 *Differentiation* **70**, 120–129.
- 387           **Mall, P. and Kumar, Y. (2014).** Effect of electromagnetic radiations on brooding,  
388 honey production and foraging behavior of European honeybees (*Apis mellifera* L.). *African*  
389 *Journal of Agricultural research* **9(13)**, 1078-1085.
- 390           **Mixson, A. T., Abramson, C. I., Nolf, S. L., Johnson, G. .A., Serrano, E., and**  
391 **Harrington, W. (2009).** Effect of GSM cellular phone radiation on the behavior of honey  
392 bees (*Apis mellifera*). *Science of Bee Culture* **1(2)**, 22-27
- 393           **Moorhouse, T. P. and Macdonald, D. W. (2005).** Indirect negative impacts of  
394 radiocollaring: sex ratio variation in water voles. *Journal of Applied Ecology*. **42(1)**, 91-98

395 **Nicholls, B. and Racey,P.A.(2007).** Bats Avoid Radar Installations: Could  
396 Electromagnetic Fields Deter Bats from Colliding with Wind Turbines? PLoS ONE 2 (3):  
397 e297.

398 **Nicholis Bi, and Paul, A. R. (2007).** Bats avoid radar installations: could  
399 electromagnetic fields deter bats from colliding with wind turbines? Plos One 2(3), e297.

400 **Pattazhy, S. (2011).** Electromagnetic radiation (EMR) clashes with honeybees.  
401 Department of Zoology, S N College, Punalur, Kerala, India. Journal of Entomology and  
402 Nematology 4(1), 1-3.

403 **Pereira-Bomfim, M.G.C., Antonialli-Junior, W.F. and AcostaAvalos, D. (2015).**  
404 Effect of magnetic field on the foraging rhythm and behavior of the swarm-founding paper  
405 wasp *Polybia paulista* Ihering (Hymenoptera: Vespidae). Sociobiology, 62, 99-104.

406 **Roeder, T. (1999).** Octopamine in invertebrates. *Prog. Neurobiol.*59, 33-561.

407 **Rossel, S. and Wehner, R. (1984).** How bees analyse the polarization patterns in the  
408 sky. J Comp Physiol A 154, 607–615.

409 **Rossel, S. and Wehner R. (1986).** Polarization vision in bees. Nature 323, 128–131.

410 **Rosen, D.A. (2003).** Mechanism of action of moderate-intensity static magnetic fields  
411 on biological systems. Cell Biochemistry Biophysics 39, 163–173.

412 **Röösli, M., Egger, M., Pfluger, D., and Minder, C. (2008).** Cardiovascular mortality  
413 and exposure to extremely low frequency magnetic fields: a cohort study of Swiss railway  
414 workers. Environ Health.7, 35.

415 **Schuz, J. and Ahlbom, A. (2008).** Exposure to electromagnetic fields and the risk of  
416 childhood leukaemia: a review. Radiat Prot Dosimetry. 132, 202–11

417 **Schwarzal, M. and Muller, U. (2006).** Dynamic memory networks: dissecting  
418 molecular mechanisms underlying associative memory in the temporal domain. *Cell. Mob.*  
419 *Life Sci.* 63, 989-998.

420 **Sharma, V. P. and Kumar, N. R. (2010).** Changes in honeybee behaviour and biology  
421 under the influence of cell phone radiations. Current Science 98(10), 1376- 1378.

422 **Singh, Y. (2014).** Effect Of Electromagnetic Waves On The Performance Of *Apis*  
423 *Mellifera* L. Master Of Science (Agriculture) Thesis University of Parmar.

424 **Stefan, M. K., Matthias, S., Wilhelm, K., and Andrea, M. (2013).** Radiation  
425 hydrodynamics integrated in the PLUTO code. Institute for Astronomy and Astrophysics,  
426 Section Computational Physics. Eberhard Karls University, Tübingen **10**, D-72076.

427 **Taye, R.R., Deka, M.K., Rahman, A. and Bathari, M. (2017).** Effect of  
428 electromagnetic radiation of cell phone tower on foraging behaviour of Asiatic honey bee,  
429 *Apis cerana F.* (Hymenoptera: Apidae), *J Entom Zool Studies* **5(3)**, 1527-1529.

430 **Vácha, M. (2006).** Laboratory behavioural assay of insect magnetoreception:  
431 magnetosensitivity of *Periplaneta americana*. *Journal of Experimental Biology* **209**, 3882–  
432 3886.

433 **Vácha, M., Drstková, D. and Puzova, T. (2008).** *Tenebrio* beetles use magnetic  
434 inclination compass. *Naturwissenschaften* **95**, 761– 765.

435 **Valberg, P. A. (2010).** Summary of potential effects of 345-kv power-line electric and  
436 magnetic fields (EMFs) on honeybee hives and honeybee behavior. Prepared for: CapX2020.  
437 20 University Road Cambridge, MA. 1-8 pp.

438 **Valková, T. and Vácha, M. (2012).** How do honeybees use their magnetic compass?  
439 Can they see the North? *Bulletin of Entomological Research*, **102**, 461-467.

440 **Vecchia, P., Matthes, R., Ziegelberger, G., Lin, J., Saunders, R., and Swerdlow, A.**  
441 **(2009).** ‘Exposure to High Frequency Electromagnetic Fields, Biological Effects and Health  
442 Consequences (100 kHz-300 GHz)’ *ICNIRP 16/2009*.

443 **Walker, M.M., and Bitterman, M.E. (1989).** Honeybees can be trained to respond to  
444 very small changes in geomagnetic field intensity. *J Exp Biol* **145**, 489–494.

445 **Wertheimer, N., and Leeper, E. (1979).** Electrical wiring configurations and  
446 childhood cancer. *Am J Epidemiol.* **109**, 273–84.

447 **Wiltschko, W. and Wiltschko, R. (2005).** Magnetic orientation and magnetoreception  
448 in birds and other animals. *Journal of Comparative Physiology A* **191**, 675–693.

449 **Wyszkowska, J., Shepherd, S., Sharkh, S., Jackson, C.W., Newland, P.L. (2016).**  
450 Exposure to extremely low frequency electromagnetic fields alters the behaviour, physiology  
451 and stress protein levels of desert locusts, *Sci. Rep.*, **6**, 36413

452 **Wyszowska, J., Stankiewicz M., Krawczyk, A., Zyss, T. (2006).** Examination of  
 453 nervous system exposed to electromagnetic field on the example of cockroach (*Periplaneta*  
 454 *americana*), *Przegląd Elektrotechniczny*, **82**, 66–67

455

456

457

458

459

460 Table:1 Application groups.

| Helmholtz<br>equipment                               | coils      | U1          | U2           | U3           | U4           | U5 |
|------------------------------------------------------|------------|-------------|--------------|--------------|--------------|----|
| <b>Magnetic Field Levels</b>                         | 0 $\mu$ T. | 50 $\mu$ T. | 100 $\mu$ T. | 150 $\mu$ T. | 200 $\mu$ T. |    |
| <b>(Strength<br/>Electromagnetic<br/>Radiations)</b> | 90 mV/m    | (118 mV/m)  | (151 mV/m)   | (211 mV/m)   | (264 mV/m)   |    |

461

462 **Table 2. Average values of the number of honeybees from Petri dishes and waiting**  
 463 **periods in Petri dishes.**

| Applications           | n  | The number<br>of honey bees from<br>Petri dishes<br>$\bar{x} \pm S\bar{x}$ | n  | waiting<br>periods<br>(Sec.)<br>$\bar{x} \pm S\bar{x}$ |
|------------------------|----|----------------------------------------------------------------------------|----|--------------------------------------------------------|
| Control (90mV/m)       | 29 | 21.07 $\pm$ 17.89 <sup>a</sup>                                             | 75 | 35.27 $\pm$ 6.97 <sup>a</sup>                          |
| 50 $\mu$ T (118 mV/m)  | 46 | 14.00 $\pm$ 17.58 <sup>b</sup>                                             | 75 | 24.81 $\pm$ 4.98 <sup>b</sup>                          |
| 100 $\mu$ T (151 mV/m) | 57 | 13.51 $\pm$ 13.34 <sup>b</sup>                                             | 75 | 21.00 $\pm$ 4.52 <sup>c</sup>                          |
| 150 $\mu$ T (211 mV/m) | 51 | 12.47 $\pm$ 10.35 <sup>c</sup>                                             | 75 | 18.73 $\pm$ 4.35 <sup>d</sup>                          |
| 200 $\mu$ T (264 mV/m) | 98 | 10.82 $\pm$ 11.77 <sup>d</sup>                                             | 75 | 12.28 $\pm$ 5.58 <sup>e</sup>                          |

464 \*Means in each column followed by different letter are significantly different (P<0.01)

465 **Table 3: Results of variance analysis on honeybee numbers in Petri dishes**

| Variation Sources   | df | Mean Square | F         | Sig. |
|---------------------|----|-------------|-----------|------|
| Minutes             | 32 | 884.793     | 3539.171  | .000 |
| Iteration           | 2  | 34.722      | 138.888   | .007 |
| Applications        | 4  | 3485.440    | 13941.762 | .000 |
| Minutes * Iteration | 64 | 11.250      | 45.001    | .022 |



|                                    |    |         |         |      |
|------------------------------------|----|---------|---------|------|
| Minutes * Applications             | 70 | 167.961 | 671.843 | .001 |
| Iteration * Applications           | 8  | 75.340  | 301.361 | .003 |
| minutes * Iteration * Applications | 98 | 10.838  | 43.350  | .023 |
| Error                              | 2  | 0.250   |         |      |

466

467

468

469

470 **Table 4: Results of analysis of variance applied to the period in which honeybees**  
471 **spend their Petri dishes.**

| Variation Resources     | f  | Mean Square | F       | Sig. |
|-------------------------|----|-------------|---------|------|
| Applications            |    | 5422.357    | 222.250 | .000 |
| Iteration               |    | 3.523       | .144    | .866 |
| Iteration* Applications |    | 7.959       | .326    | .956 |
| Error                   | 60 | 24.398      |         |      |

472

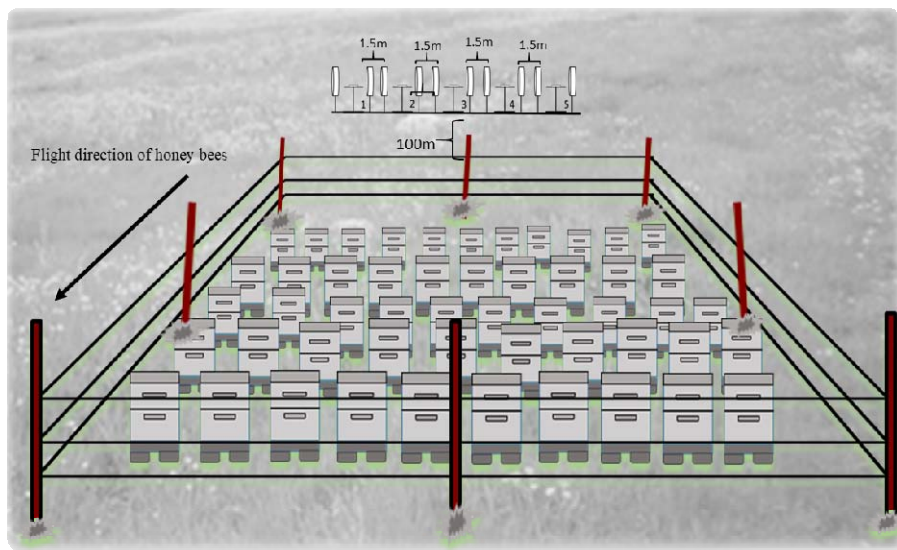

473

474 **Figure 1. Positions of Helmholtz coil equipment according to apiary.**

475

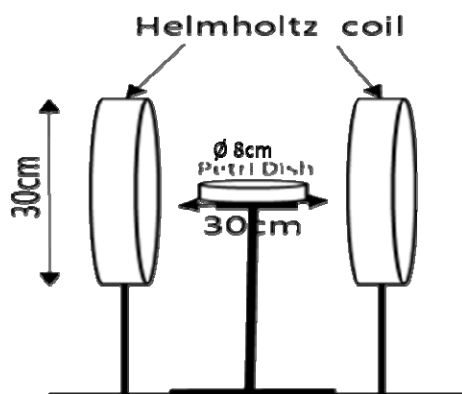

476

477

**Figure 2. Representation of the Helmholtz coil equipment.**

478

479

480
